# Supplementary material for: Does the GPM mission improve the systematic error component in satellite rainfall estimates over TRMM? An evaluation at a pan-India scale
Source: Copernicus journal article supplement (doi:10.5194/hess-21-6117-2017), 2017-12-01
Supplement: Supplementary file 2 [file 2.R_Pbias_TRMM_IMERG_2014.xlsx]

## Sheet: Overall_corr_Pbias
Catchment ID	R (IMERG RESEARCH PRODUCT)	R (TRMM)	Pbias (IMERG RESEARCH PRODUCT)	P (TRMM)
1	0.907542	0.886516	-2.73967	0.0137421
2	0.864965	0.883329	17.4875	23.2762
3	0.567355	0.57588	240.821	237.36
4	0.257313	0.436324	8.1755	1.60633
5	0.899824	0.908914	3.98189	9.20889
6	0.89587	0.888682	-1.46634	7.90742
7	0.909663	0.879919	1.88358	1.6538
8	0.744036	0.797993	-27.3085	9.66104
9	0.711041	0.690027	7.06727	2.50666
10	0.889187	0.824166	-22.1314	5.34473
11	0.861154	0.845733	-24.0257	-6.83401
12	0.81828	0.811086	-13.7351	-14.4681
13	0.856975	0.814764	18.2663	4.19957
14	0.816807	0.837064	29.6934	26.773
15	0.820912	0.856578	-33.6574	9.1993
16	0.790639	0.755569	-21.9592	2.40527
17	0.833383	0.755657	11.899	6.16615
18	0.885251	0.82824	10.9927	20.6936
19	0.821875	0.768684	21.9203	27.0053
20	0.845127	0.799283	4.46176	12.6456
21	0.899923	0.871228	5.99989	9.44929
22	0.909325	0.89261	-8.84892	-23.1426
23	0.863941	0.83068	-2.71937	4.43199
24	0.742782	0.800756	-53.1479	22.9426
25	0.853083	0.854184	-0.708198	1.75462
26	0.896142	0.834165	4.01415	4.03574
27	0.826774	0.805358	15.0214	15.0787
28	0.853557	0.838455	43.5398	41.4617
29	0.82139	0.855389	26.2426	21.2218
30	0.918904	0.89729	6.98425	2.12041
31	0.369667	0.21021	-37.289	-53.7946
32	0.915402	0.8977	2.1259	2.54923
33	0.827908	0.784113	75.2052	55.8251
34	0.718873	0.648869	58.3076	55.4201
35	0.815106	0.833722	30.4645	33.6236
36	0.935292	0.911761	5.75433	5.38522
37	0.696232	0.632738	-36.8148	-48.7485
38	0.576255	0.666945	-16.1314	-28.8434
39	0.919381	0.86371	-1.84925	-13.4579
40	0.912983	0.895763	-1.06481	2.09779
41	0.841135	0.815834	-5.5684	-6.34565
42	0.898919	0.890893	-11.3279	-5.09002
43	0.828971	0.76929	8.80905	-4.64634
44	0.838151	0.800792	0.358681	10.8151
45	0.838727	0.833994	-10.3314	30.3269
46	0.900599	0.908422	15.8673	10.394
47	0.917621	0.907074	1.96256	5.05772
48	0.888237	0.910264	1.57537	1.80197
49	0.899245	0.891486	13.7286	5.09729
50	0.870667	0.81054	0.536691	19.6782
51	0.869591	0.835256	20.1173	14.3739
52	0.860815	0.863847	43.3651	33.5632
53	0.873641	0.904926	17.8129	19.1082
54	0.858292	0.820217	-4.56132	10.4727
55	0.910821	0.89714	0.00115509	9.3424
56	0.840505	0.845314	7.64214	5.85039
57	0.847776	0.81493	-4.87779	-10.9226
58	0.833573	0.713885	16.3282	15.8655
59	0.840087	0.747247	16.1448	20.4094
60	0.789162	0.694382	3.60473	14.3783
61	0.893966	0.87694	17.6281	17.4135
62	0.793777	0.756267	-4.25132	-10.2173
63	0.828808	0.816432	24.5344	16.9506
64	0.949868	0.938779	3.72256	4.79535
65	0.936556	0.851351	23.7316	18.2259
66	0.797563	0.827166	22.0519	12.6699
67	0.879236	0.923762	-43.6378	5.81108
68	0.910349	0.871835	-7.35095	9.31002
69	0.882555	0.899315	-33.2167	4.72134
70	0.83209	0.817923	25.6206	31.5634
71	0.697679	0.631276	-24.52	-12.1574
72	0.890861	0.856496	-8.46732	28.6655
73	0.393093	0.812145	731.615	383.316
74	0.864906	0.873706	0.689912	0.931217
75	0.839366	0.843983	-3.43308	5.46615
76	0.888962	0.836021	-13.4012	4.47931
77	0.947887	0.942839	40.5139	43.3541
78	0.958918	0.932766	11.6036	21.3044
79	0.726462	0.888406	-6.12687	6.64387
80	0.916247	0.849126	17.3682	13.9809
81	0.829161	0.80517	-7.32145	-1.61508
82	0.873502	0.891786	32.1693	44.6762
83	0.855305	0.791526	12.5064	12.647
84	0.88627	0.825606	8.27885	12.6087
85	0.814829	0.751066	4.81688	6.69351
86	0.787972	0.775185	-11.1294	-10.4378
87	0.9282	0.951781	22.8597	22.3253
88	0.925774	0.932617	8.91426	16.2766
89	0.908484	0.89725	9.1068	16.9369
90	0.875633	0.900199	28.3812	34.6335
91	0.724592	0.818659	8.9122	12.0518
