# Supplementary material for: Does the GPM mission improve the systematic error component in satellite rainfall estimates over TRMM? An evaluation at a pan-India scale
Source: Copernicus journal article supplement (doi:10.5194/hess-21-6117-2017), 2017-12-01
Supplement: Supplementary file [file hess-21-6117-2017-supplement-title-page.pdf › hess-21-6117-2017-supplement-title-page.pdf]

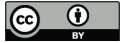

## *Supplement of*

# **Does the GPM mission improve the systematic error component in satellite rainfall estimates over TRMM? An evaluation at a pan-India scale**

**Harsh Beria et al.**

*Correspondence to:* Harsh Beria ([harsh.beria@unil.ch](mailto:harsh.beria@unil.ch))

- [hess-21-6117-2017-supplement-title-page.pdf](#)
- Supplementary
  - [Supplementary.docx](#)
  - [1. Catchment\\_information.xlsx](#)
  - [2. R\\_Pbias\\_TRMMIMERG\\_2014.xlsx](#)

The copyright of individual parts of the supplement might differ from the CC BY 3.0 License.
